# Supplementary material
Source: publisher figshare collection journal article supplement (https://acs.figshare.com/ndownloader/files/4204096)

# Contribution of dynamic and static quenchers for the study of protein conformation in ionic liquids by steady-state fluorescence spectroscopy

*Mourad Bekhouche <sup>a</sup>, Loïc J. Blum <sup>a</sup>, Bastien Doumèche <sup>\*a</sup>*

<sup>a</sup> ICBMS, Institut de Chimie et Biochimie Moléculaires et Supramoléculaires, CNRS UMR 5246, Université Lyon 1 , 43 boulevard du 11 novembre 1918, Villeurbanne, F-69622, France

\*E-mail address: doumeche@univ-lyon1.fr

## Supporting Information

# 1. Lehrer representation of the quenching of the FDH fluorescence by iodide in PBS buffer.

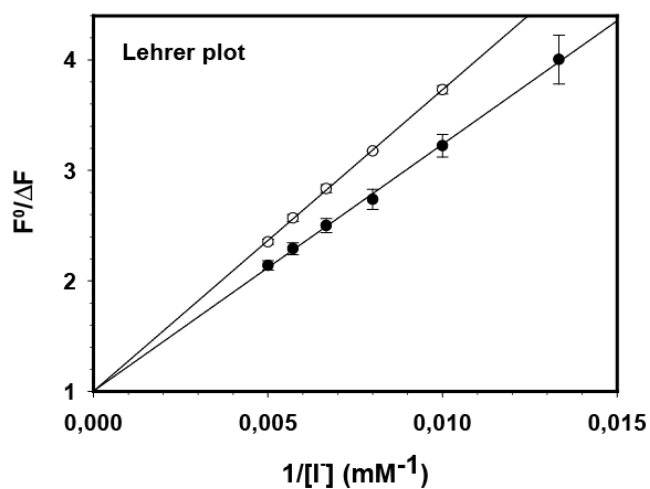

- Excitation 280 nm:  $223.2/[I^-] + 1.004$ ;  $R^2 = 0.998$
- Excitation 295 nm:  $272.8/[I^-] + 1.002$ ;  $R^2 = 0.999$

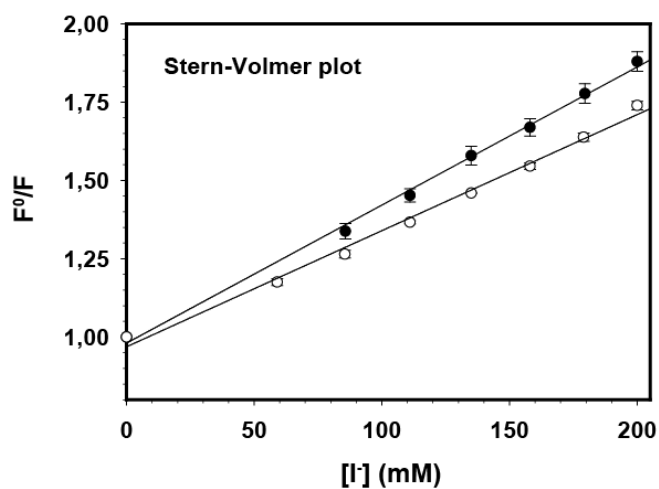

- Excitation 280 nm:  $0.98 + 0.00441 [I^-]$ ;  $R^2 = 0.997$
- Excitation 295 nm:  $0.97 + 0.0037 [I^-]$ ;  $R^2 = 0.993$

| Excitation wavelength | Lehrer Plot                  |                                       | Stern-Volmer Plot                     |
|-----------------------|------------------------------|---------------------------------------|---------------------------------------|
|                       | $\alpha$ ( $\text{M}^{-1}$ ) | $K_{SV}^{Iodide}$ ( $\text{M}^{-1}$ ) | $K_{SV}^{Iodide}$ ( $\text{M}^{-1}$ ) |
| 280 nm                | 0.99                         | 4.48                                  | 4.28                                  |
| 295 nm                | 0.99                         | 3.67                                  | 3.49                                  |

**2. Structure of the FDH from *Candida boidinii*.** Structure of the chains A (black) and D (white) of the formate dehydrogenase from *Candida boidinii* forming the dimeric form (pdb entry 2fss) represented in the ribbon form. Fluorescent residues are depicted as stick and sphere. Only residues of the chain A are shown for clarity. Tryptophanyl residues are shown in pink. Tyrosinyl residues are in green.

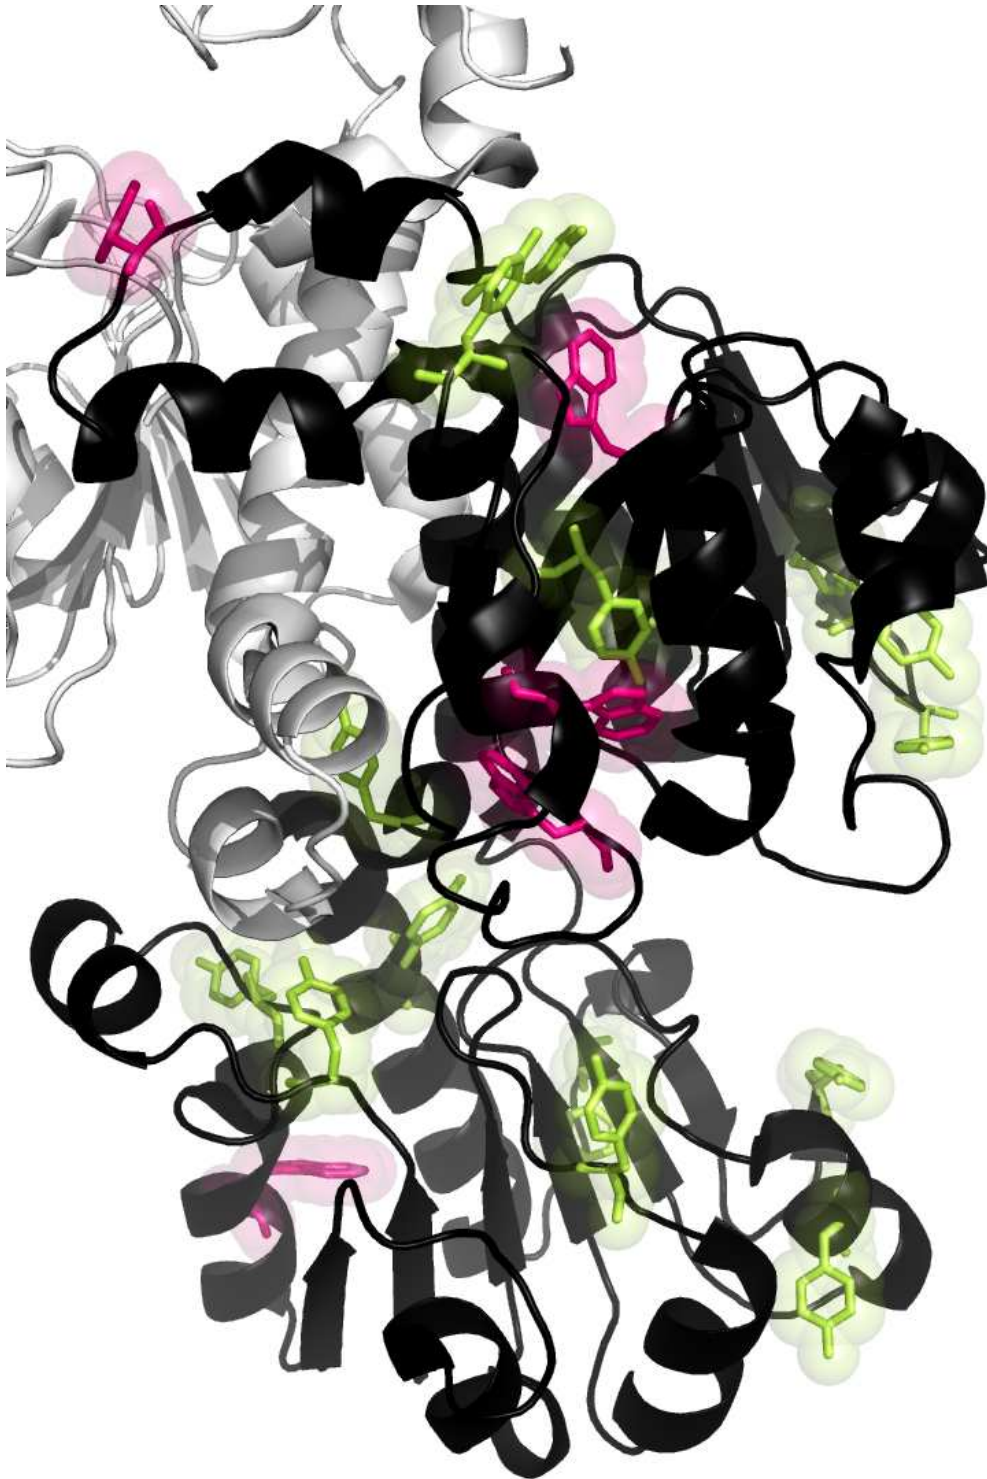

### 3. Emitted light intensity of the FDH at increasing IL concentration analyzed by equation (3)

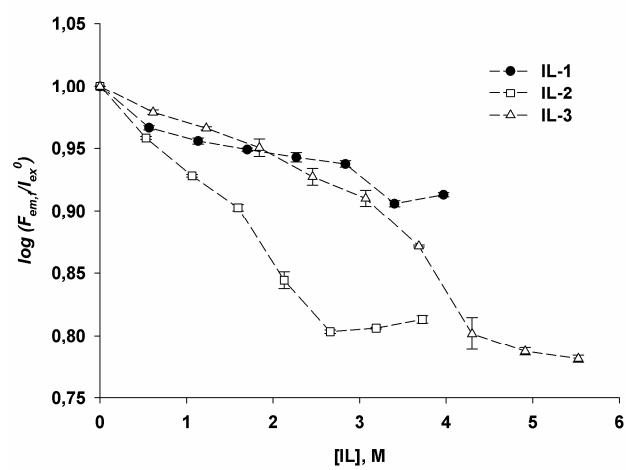

**4. Quenching of the FDH fluorescence by imidazole.** FDH fluorescence spectrum is recorded in the presence of 0, 118, 171, 222, 270, 316 and 359 mM of imidazole. Maximum fluorescence intensities at 335 nm are used for the  $K_{SV}$  determination. All the experiments are performed in triplicate and medium fluorescence is subtracted. As the quenching is very low, data are not well fitted.

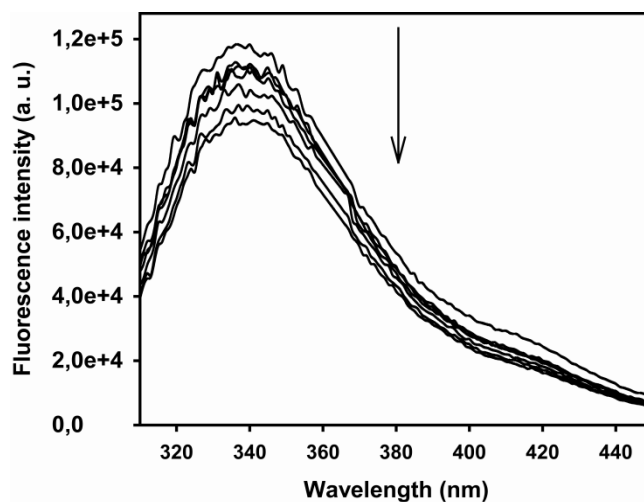

**5. Quenching of a Trp solution by the ILs or imidazole.** In the case of the tryptophan quenching by **IL-1-3**, the concentration of the solution of tryptophan is fixed at 50  $\mu\text{M}$  to have a fluorescence intensity approximately in the same range than the FDH (Figure 3). In the case of tryptophan quenching by imidazole, its concentration is 10  $\mu\text{M}$ . All the experiments are performed in triplicate and the fluorescence of the medium is subtracted. Spectra are recorded in the presence of (a) 0 - 3.969 M of **IL-1** by 0.567 M concentration steps, (b) 0 - 3.724 M of **IL-2** by 0.532 M concentration steps, (c) 0 - 4.298 M of **IL-3** by 0.614 M concentration steps and (d) 0 - 5.6 M of imidazole by 0.8 M concentration steps. (f) Emitted light intensity of the tryptophan solution at increasing IL concentration is analyzed by eq. (3).

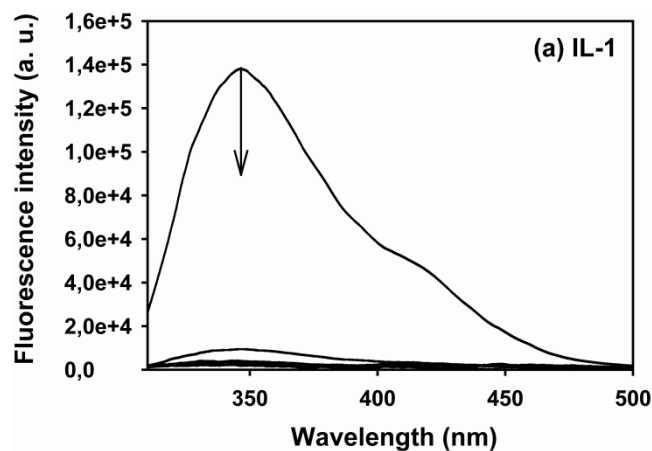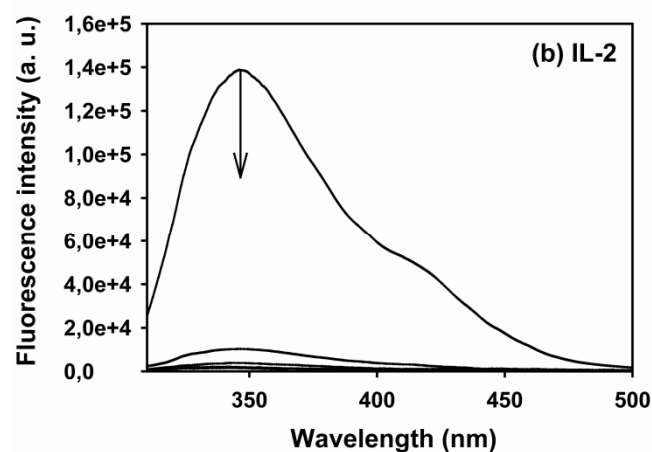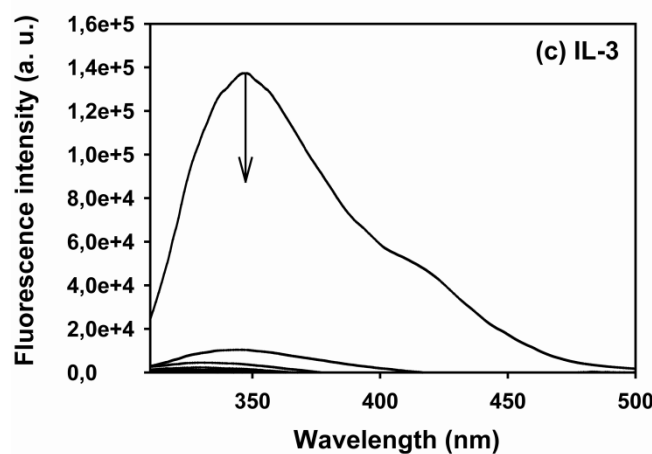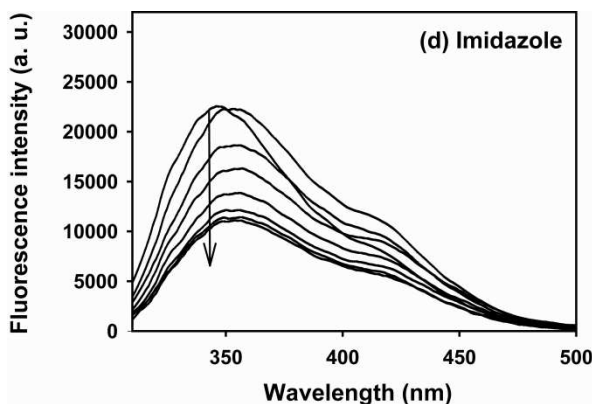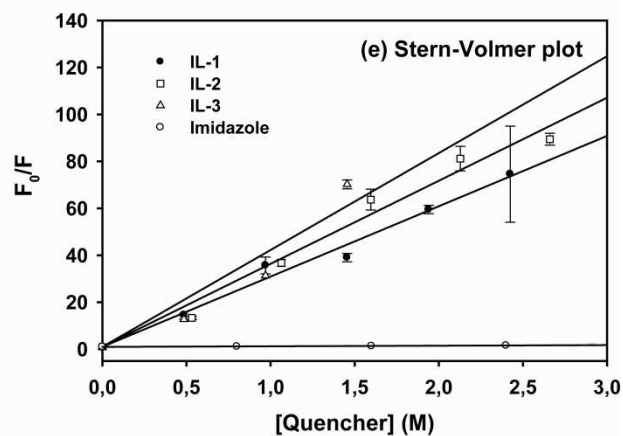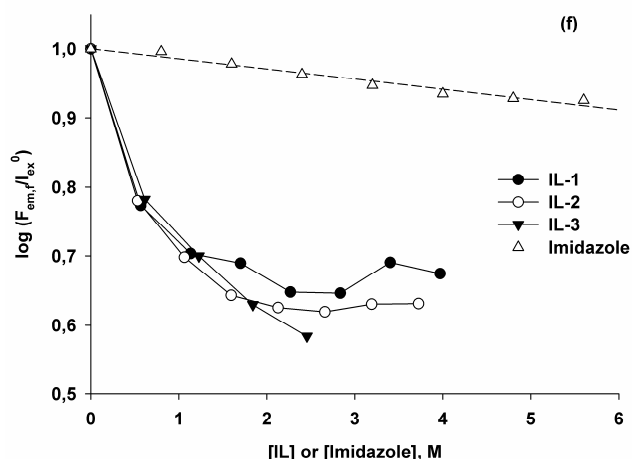

**6. Urea denaturation.** Evolution of the  $K_{SV}$  after quenching of the FDH fluorescence by acrylamide or iodide in presence of different concentration of urea. Iodide ( $\square$ ), Acrylamide ( $\triangle$ ).

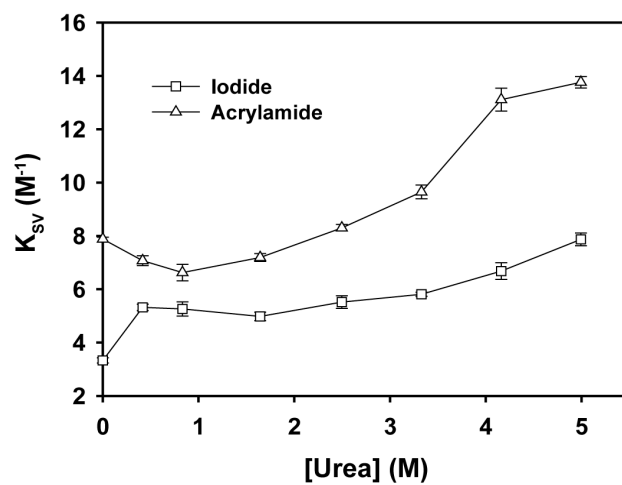

7. FTIR spectra of FDH in the absence (red) and in the presence of 10-90 % (v/v) [MMIm][Me<sub>2</sub>PO<sub>4</sub>] (IL-1) at ~10 mg ml<sup>-1</sup>. No clear signal corresponding to the FDH could be observed in this IL. The solvent subtraction is not efficient. *Insert:* FTIR spectra of the FDH in PBS.

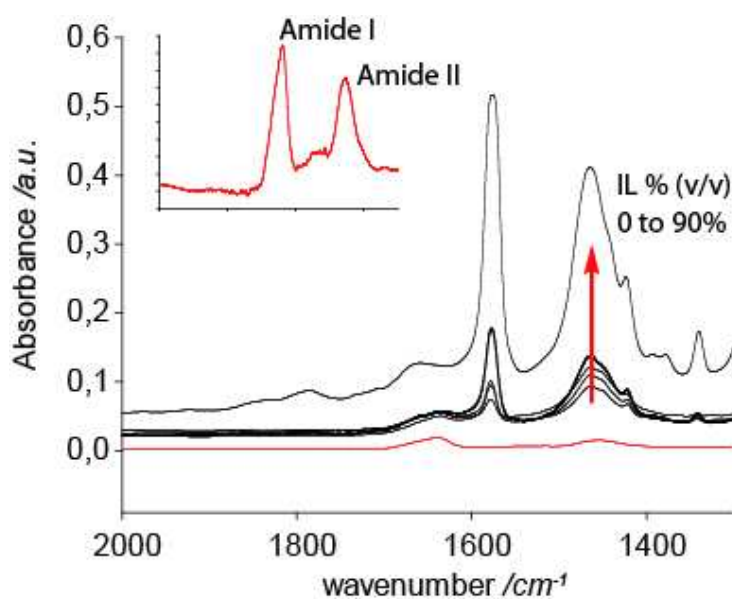



8. CD spectra of FDH in PBS (red) and in the presence of 10 % (v/v) [MMIm][Me<sub>2</sub>PO<sub>4</sub>] (IL-1) (up) and detector signal obtained for buffer (dotted) and of 10-30 % (v/v) [MMIm][Me<sub>2</sub>PO<sub>4</sub>] (IL-1) in buffer (down). Similar spectra are obtained with IL-2 and IL-3.

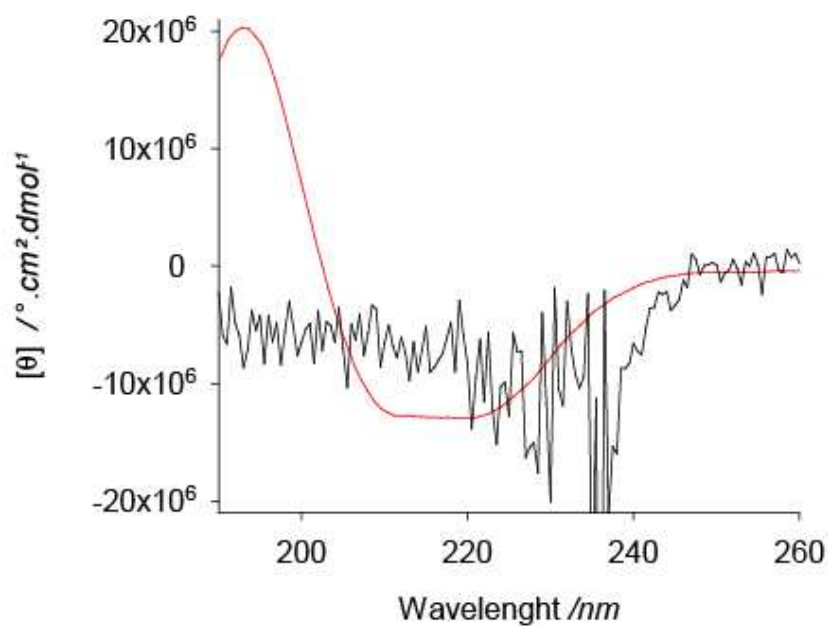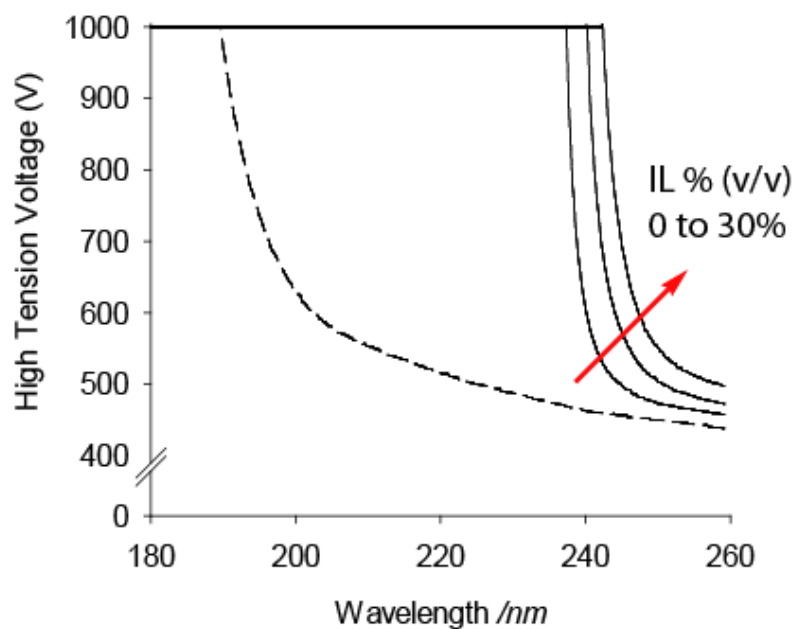

Supplement: Supplementary file 1 [file 4204096]
